# Supplementary material for: Percolation threshold-inspired design of hierarchical multiscale hybrid architectures based on carbon nanotubes and silver nanoparticles for stretchable and printable electronics
Source: Royal Society of Chemistry journal article supplement (doi:10.1039/c6tc01728b), 2016-01-01
Supplement: c6tc01728b1.pdf [file c6tc01728b1.pdf]

## Supporting Information (SI)

### **Percolation threshold-inspired design of hierarchical multiscale hybrid architecture based on carbon nanotube and silver nanoparticle for stretchable and printable electronics**

Songfang Zhao,<sup>a,b</sup> Jinhui Li,<sup>b</sup> Duxia Cao,<sup>a</sup> Yongju Gao,<sup>b</sup> Wangping Huang,<sup>b</sup> Guoping Zhang,<sup>\*b</sup> Rong Sun,<sup>\*b</sup> Ching-Ping Wong<sup>c</sup>

<sup>a</sup>School of Material Science and Engineering, University of Jinan, Jinan 250022, Shandong, China

<sup>b</sup>Shenzhen Institutes of Advanced Technology, Chinese Academy of Sciences, Shenzhen 518055, China

<sup>c</sup>School of Materials Science and Engineering, Georgia Institute of Technology, 771 Ferst Drive, Atlanta, Georgia, 30332, United States

\*E-mail: gp.zhang@siat.ac.cn, rong.sun@siat.ac.cn

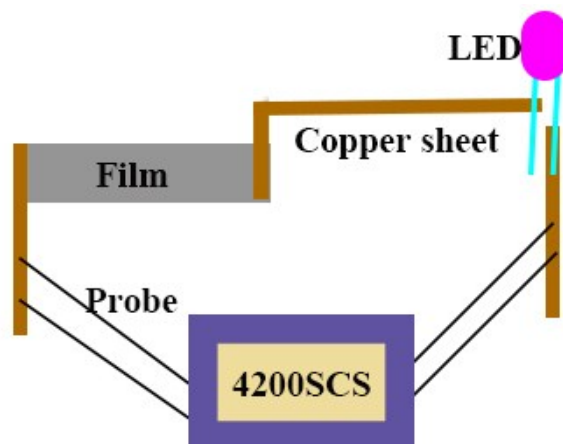

Fig.S1 Connection schematics of the whole measuring circuit

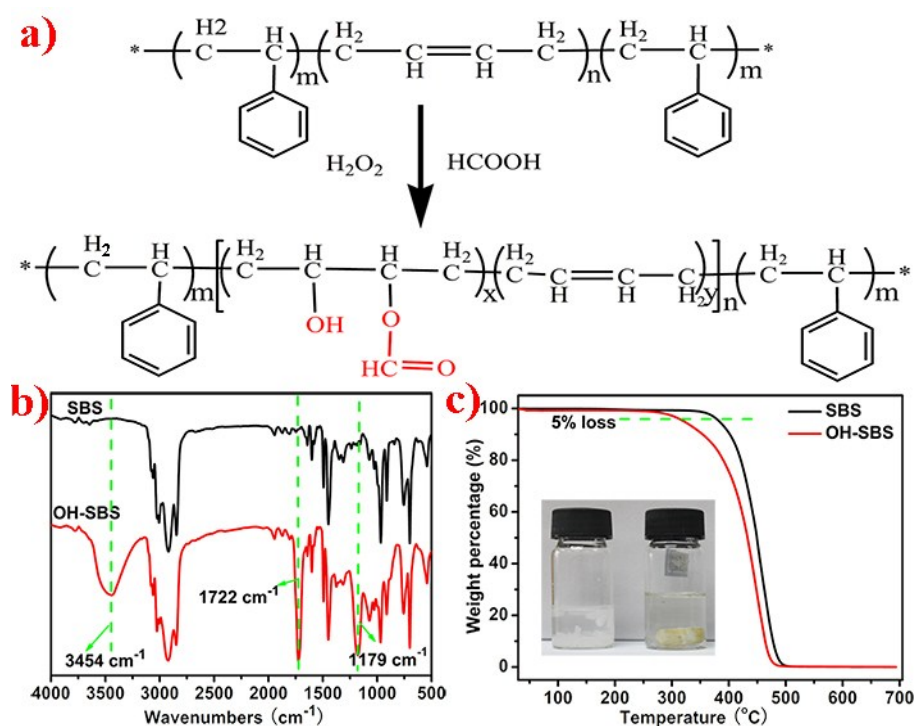

Fig.S2 (a) Modification schematics of SBS via oxidation of  $\text{H}_2\text{O}_2$  and  $\text{HCOOH}$ ; (b) FTIR spectra of SBS and OH-SBS; (c) TGA curves of SBS and OH-SBS, the inset is the dissolved state of SBS and OH-SBS in DMF

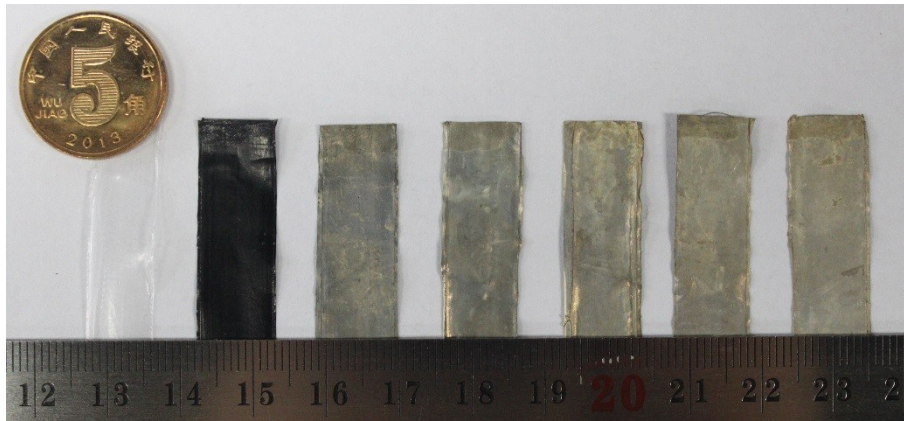

**Fig.S3** Digital images of various OH-SBS composites with different content of Ag NPs

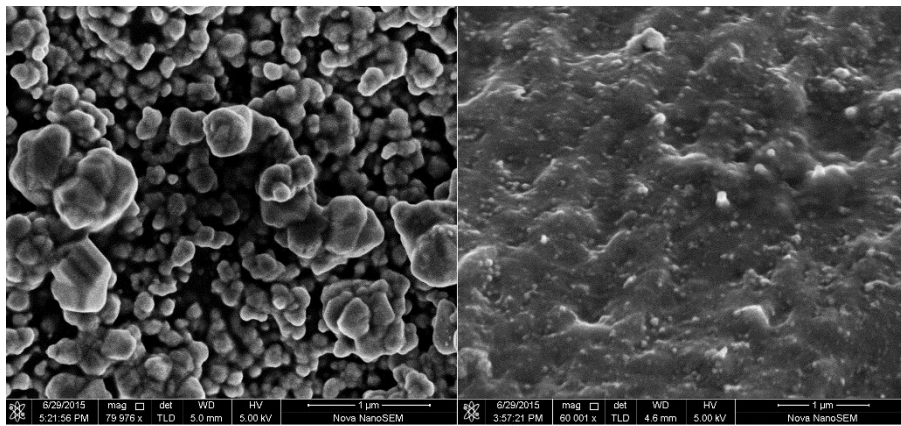

**Fig.S4** SEM images of Ag NPs generated on the surface (a) and inner (b) of composite

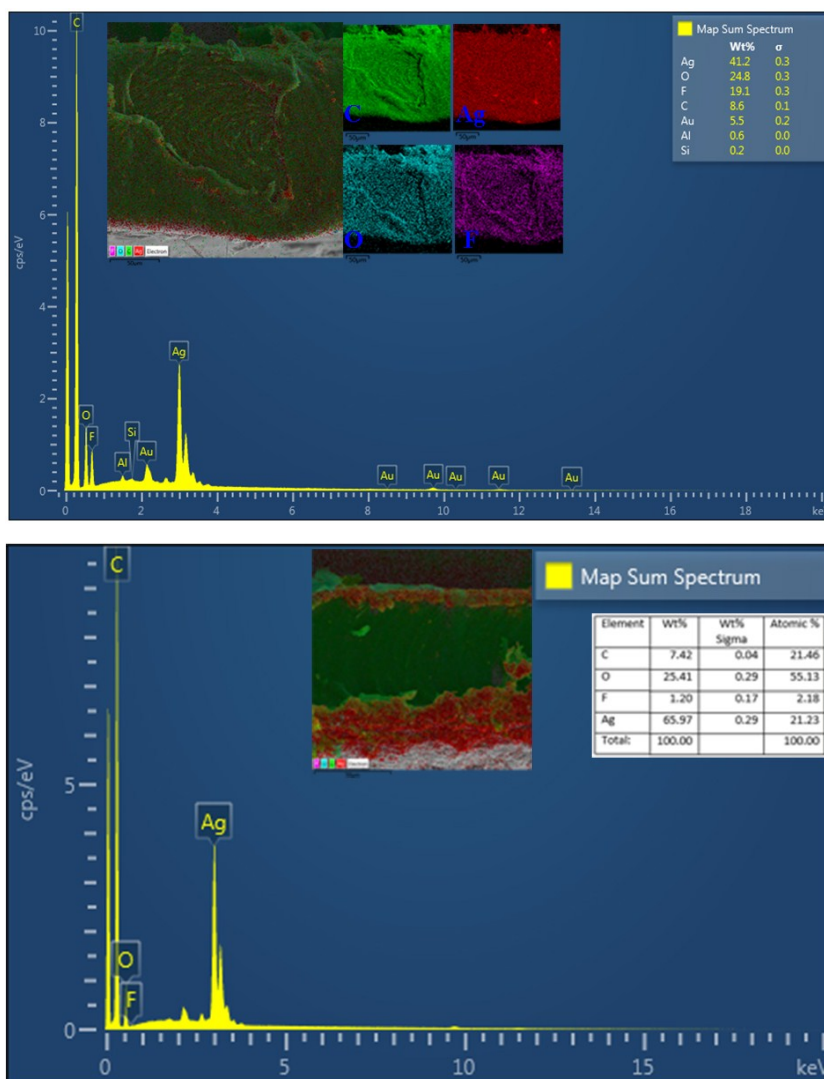

**Fig.S5** The EDS spectrum and their corresponding EDS mapping images: (a) OH-SBS/CNTs/STA, (b) OH-SBS/CNTs/Ag NPs

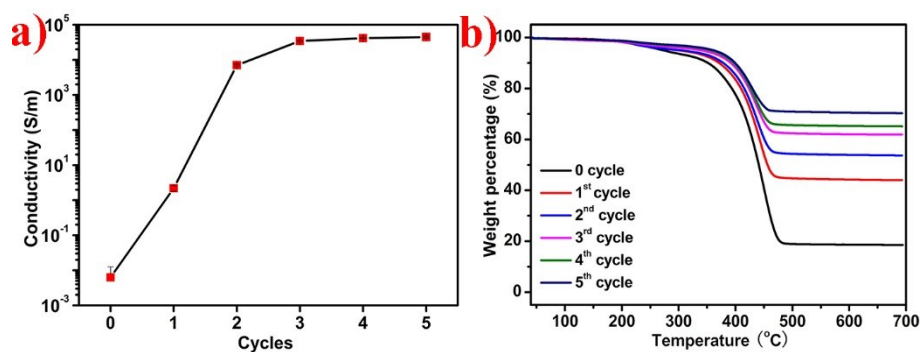

**Fig.S6** (a) Initial conductivity of CNTs (18.5 wt%)-Ag NPs embedded composites depending on the number of repeated process for Ag ions absorption and reduction; (b) TGA curves of the CNTs-Ag NPs embedded composites for different cycles of absorption and reduction of Ag ions

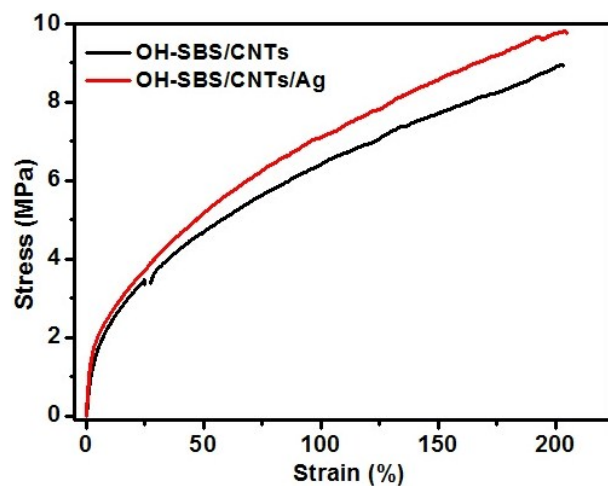

**Fig.S7** Stress-strain curves of CNTs (18.5 wt%)/OH-SBS composite and CNTs (18.5 wt%)/Ag NPs/OH-SBS composite

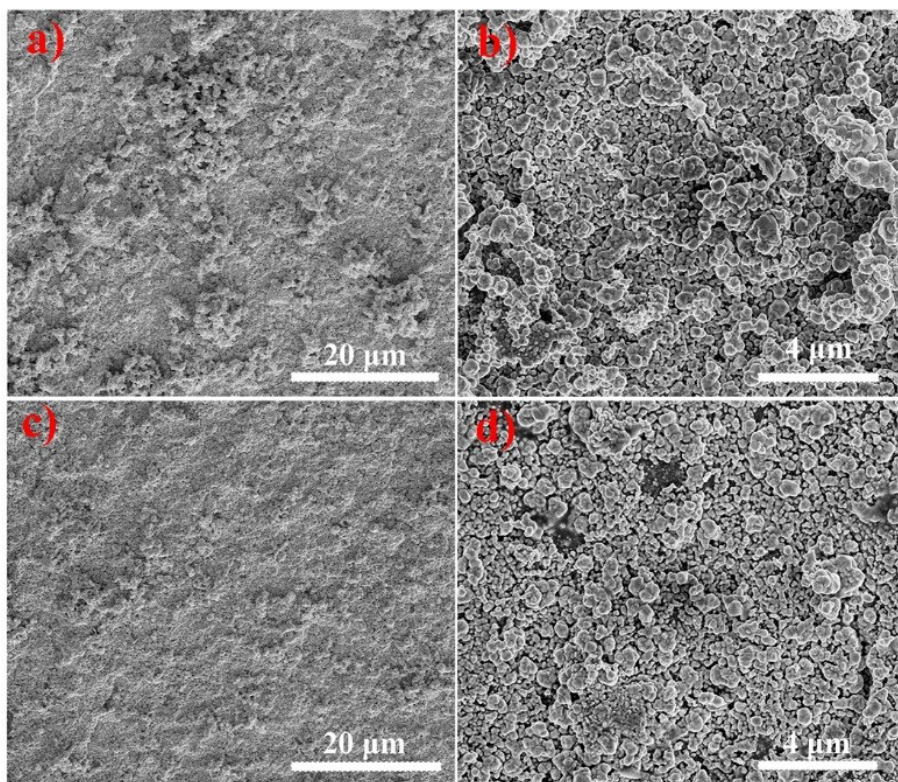

**Fig.S8** SEM images of CNTs (2 wt%)-Ag NPs embedded composites: (a) before scraping; (b) after scraping of the Ag NPs using common tape

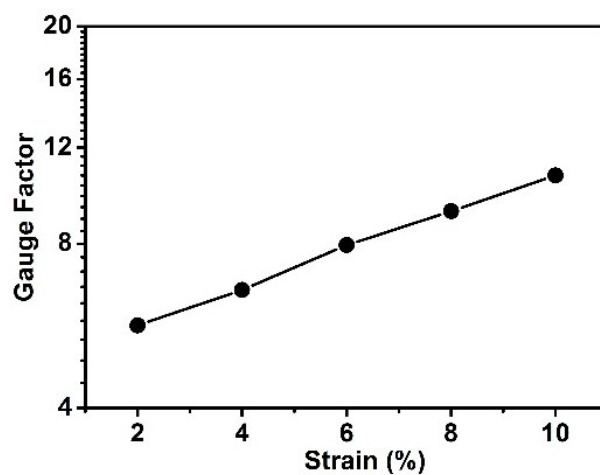

**Fig.S9** Gauge factor as a function of tensile strain (<10%)

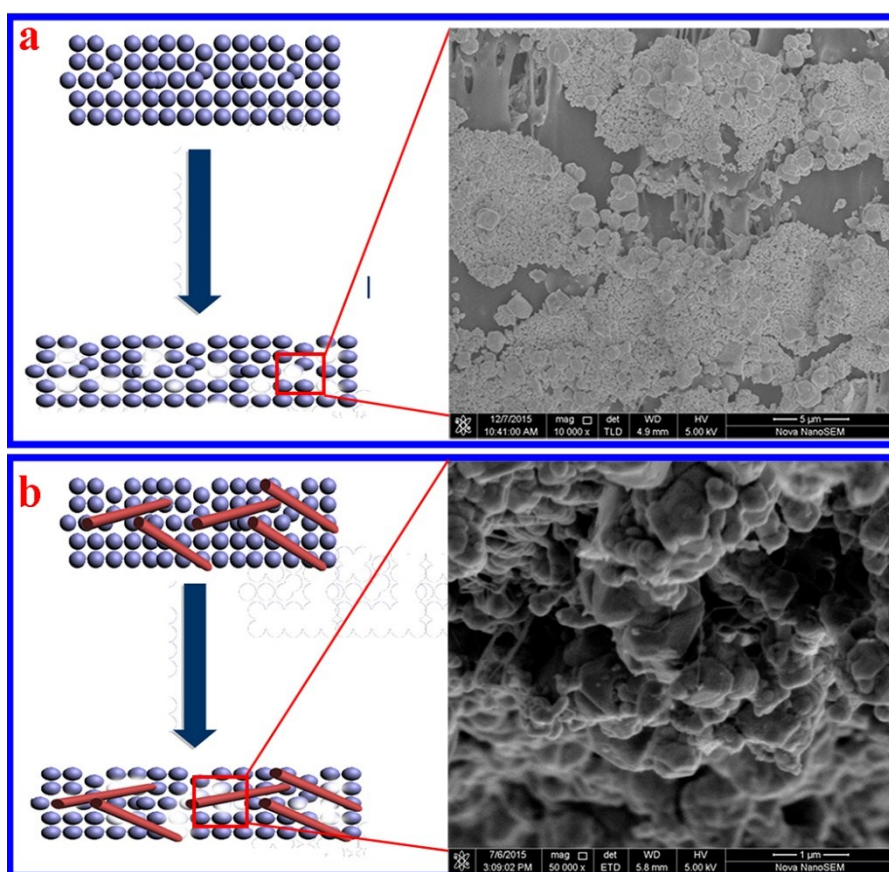

**Fig.S10** Schematic illustration of CNTs as bridges between separated Ag NPs under stretching: (a) without CNTs; (b) with 2.0 wt% CNTs

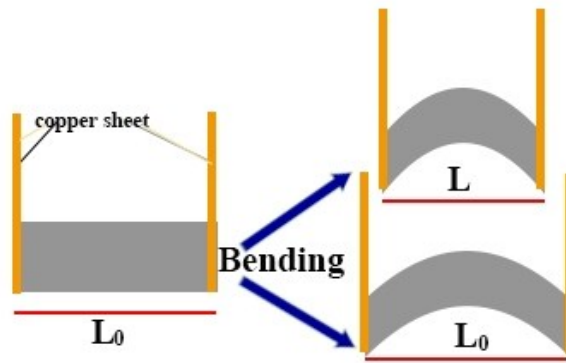

**Fig.S11** Two different schematics of bending process

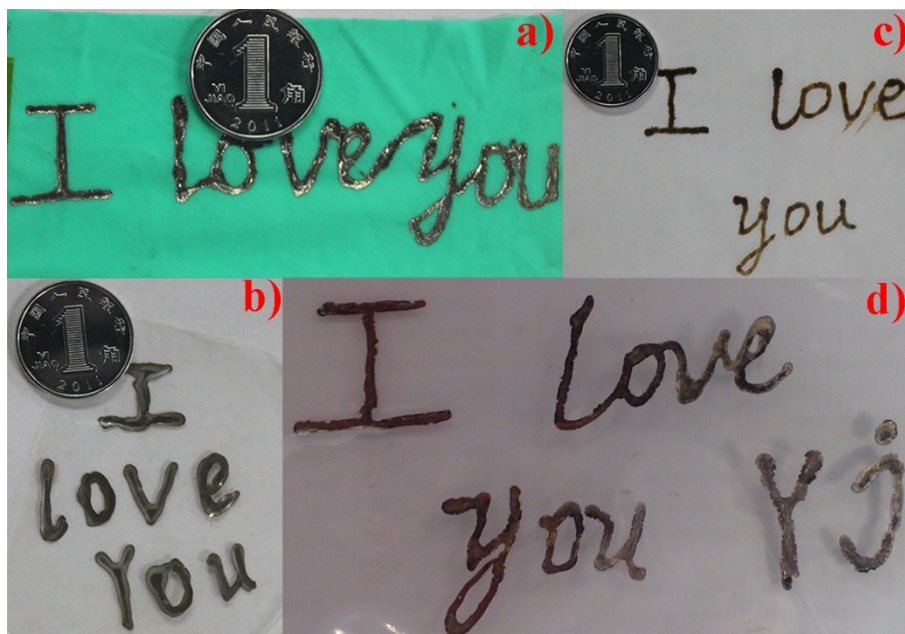

**Fig.S12** Electronic circuits written by our electronic paste on various substrates: (a) Nitrile butadiene rubber (NBR); (b) Common A4 paper; (c) SBS; (d) Laboratory ziplock bag

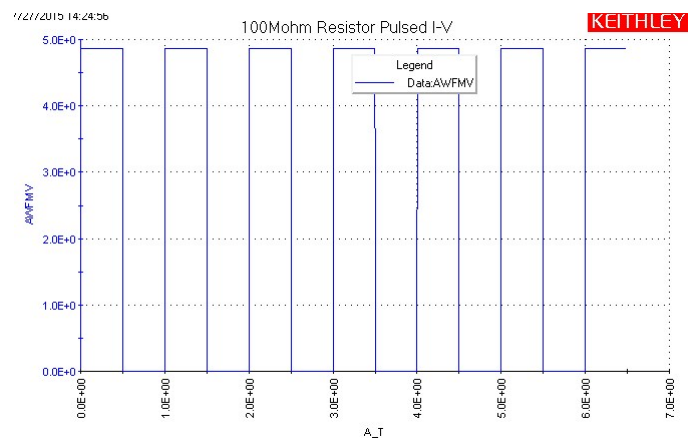

**Fig.S13** Interval voltage applied to the “I love you” circuit

**Table S1** Selected parameters extracted from our work and the reported papers on strain gauge sensors

| Matrix                                                      | Conductive filler       | Max. Strain | Initial conductivity (S cm <sup>-1</sup> ) | Gauge factor | Printability | References and year  |
|-------------------------------------------------------------|-------------------------|-------------|--------------------------------------------|--------------|--------------|----------------------|
| Polyurethane (PU)                                           | Silver nanoflowers      | 150%        | 20,500                                     | 211          | No           | 2015 <sup>[1]</sup>  |
| Polystyrene-block-polyisoprene-polystyrene                  | Ag NPs                  | 200%        | 0.8 Ω·cm <sup>-1</sup>                     | 25           | Yes          | 2016 <sup>[2]</sup>  |
| Styrene-butadiene-styrene (SBS)                             | Ag NWs                  | N/A         | 4,000                                      | 6            | Yes          | 2015 <sup>[3]</sup>  |
| Poly(m-phenylene isophthalamide) (PMIA)                     | FWCNTs                  | 220%        | 109.63                                     | 5.4          | No           | 2015 <sup>[4]</sup>  |
| Polydimethylsiloxane (PDMS)                                 | Ag NWs                  | 35%         | 34,000                                     | 20           | No           | 2015 <sup>[5]</sup>  |
| Styrene-butadiene-styrene (SBS)                             | Ag NWs, Ag NPs          | 900%        | 2,450                                      | 15           | No           | 2015 <sup>[6]</sup>  |
| Polydimethylsiloxane (PDMS)                                 | Crumpled graphene       | 100%        | N.A.                                       | 7.1          | No           | 2014 <sup>[7]</sup>  |
| Nitrile Butadiene rubber (NBR)                              | Ag flakes, nAg-MWNTs    | 600%        | 37,521                                     | 0.007        | Yes          | 2012 <sup>[8]</sup>  |
| Polyvinylidene fluoride (PVDF)                              | Ag flakes, nAg-MWNTs    | 140%        | 5,710                                      | N.A.         | Yes          | 2010 <sup>[9]</sup>  |
| Polydimethylsiloxane (PDMS)                                 | Ag NPs, CNTs            | 2.4%        | 3,000                                      | 95           | Yes          | 2014 <sup>[10]</sup> |
| Eco-flex                                                    | Ag NWs                  | 460%        | N.A.                                       | 1.52         | Yes          | 2012 <sup>[11]</sup> |
| Polydimethylsiloxane (PDMS)                                 | CNTs, graphene          | 80%         | 0.27                                       | N.A.         | No           | 2014 <sup>[12]</sup> |
| Styrene-butadiene-styrene (SBS)                             | Ag NPs                  | 140%        | 5,450                                      | 10           | Yes          | 2012 <sup>[13]</sup> |
| Eco-flex                                                    | Ag NWs, SWCNTs          | 460%        | N.A.                                       | <7           | No           | 2014 <sup>[14]</sup> |
| Polyethylene terephthalate (PET)                            | Au NPs                  | 10%         | 0.05                                       | 90           | No           | 2011 <sup>[15]</sup> |
| Poly(vinylidene fluoride-co-hexafluoropropylene) (PVDF-HFP) | Ag NPs, nAg-MWNTs       | 350%        | 2,681                                      | 8,000        | No           | 2014 <sup>[16]</sup> |
| Polyurethane                                                | PEDOT:PSS               | 350%        | 25                                         | 6            | No           | 2014 <sup>[17]</sup> |
| Poly[styrene-b-(ethylene-co-butylene)-b-styrene]            | Eutectic gallium indium | 800%        | 3*10 <sup>-5</sup> Ω·cm <sup>-1</sup>      | 6            | No           | 2013 <sup>[18]</sup> |
| Nature rubber                                               | graphene                | 800%        | 0.001                                      | 35           | No           | 2014 <sup>[19]</sup> |
| Styrene-butadiene-styrene (SBS)                             | Ag NPs, CNTs            | 550%        | 1665                                       | 26500        | Yes          | Our work             |

## References

- [1] R. J. Ma, B. G. Kang, S. Cho, M. J. Choi and S. H. Baik, *ACS Nano*, 2015, 9, 10876.
- [2] M. J. Hu, X. B. Cai, Q. Q. Guo, B. Bian, T. Y. Zhang and J. Yang, *ACS Nano*, 2016, 10, 396.
- [3] S. J. Choi, J. K. Park, W. J. Hyun, J. W. Kim, J. M. Kim, Y. B. Lee, C. Y. Song, H. J. Hwang, J. H. Kim, T. Hyeon and D. H. Lim, *ACS Nano*, 2015, 9, 6626.
- [4] S. J. Jiang, H. B. Zhang, S. Q. Song, Y. W. Ma, J. H. Li, G. H. Lee, Q. W. Han and J. Liu, *ACS Nano*, 2015, 9, 10252.



- [5] K. K. Kim, S. Hong, H. M. Cho, J. Lee, Y. D. Suh, J. Ham and S. H. Ko, *Nano Lett.*, 2015, 15, 5240.
- [6] S. Lee, S. Shin, S. Lee, J. Seo, J. Lee, S. Son, H. J. Cho, H. Algadi, S. Al-Sayari, D. E. Kim and T. Lee, *Adv. Funct. Mater.*, 2015, 25, 3114.
- [7] C. Y. Yan, J. X. Wang, W. B. Kang, M. Q. Cui, X. Wang, C. Y. Foo, K. J. Chee and P. S. Lee, *Adv. Mater.*, 2014, 26, 2022.
- [8] R. J. Ma, S. Y. Kwon, Q. Zheng, H. Y. Kwon, J. I. Kim, H. R. Choi and S. H. Baik, *Adv. Mater.*, 2012, 24, 3344.
- [9] K. Y. Chun, Y. Oh, J. Rho, J. H. Ahn, Y. J. Kim, H. R. Choi and S. H. Baik, *Nat. Nanotech.*, 2010, 5, 853.
- [10] K. Takei, Z. B. Yu, M. Zheng, H. Ota, T. Takahashi and A. Javey, *P. Natl. Acad. Sci. USA*, 2014, 111, 1703.
- [11] P. Lee, J. Lee, H. Lee, J. Yeo, S. Hong, K. H. Nam, D. J. Lee, S. S. Lee and S. H. Ko, *Adv. Mater.*, 2012, 24, 3326.
- [12] M. T. Chen, L. Zhang, S. S. Duan, S. L. Jing, H. Jiang and C. Z. Li, *Adv. Funct. Mater.*, 2014, 24, 7548.
- [13] M. Park, J. Im, M. Shin, Y. Min, J. Park, H. Cho, S. Park, M. B. Shim, S. Jeon, D. Y. Chung, J. Bae, J. Park and Y. Jeong, *Nat. Nanotech.*, 2012, 7, 803.
- [14] P. Lee, J. Ham, J. Lee, S. Hong, S. Han, Y. D. Suh, S. E. Lee, J. Yeo, S. S. Lee, D. Lee and S. H. Ko, *Adv. Funct. Mater.*, 2014, 24, 5671.
- [15] C. Farcau, N. M. Sangeetha, H. Moreira, B. Viallet, J. Grisolia, D. Ciuculescu-Pradine and L. Ressier, *ACS Nano*, 2011, 5, 7137.
- [16] R. Ma, J. Lee, D. Choi, H. Moon and S. Baik, *Nano Lett.*, 2014, 14, 1944.
- [17] M. Z. Seyedin, J. M. Razal, P. C. Innis and G. G. Wallace, *Adv. Funct. Mater.*, 2014, 24, 3104.
- [18] S. Zhu, J. H. So, R. Mays, S. Desai, W. R. Barnes, B. Pourdeyhimi and M. D. Dickey, *Adv. Funct. Mater.*, 2013, 23, 2308.
- [19] C. S. Boland, U. Khan, C. Backes, A. O'Neill, J. McCauley, S. Duane, R. Shanher, Y. Liu, I. Jurewicz, A. B. Dalton and J. N. Coleman, *ACS Nano*, 2014, 8, 8819.
